# Supplementary material
Source: PubMed Central journal article supplement (PMC4239174)

## Supplemental Table

### Supplemental Table I | $E_{\max}$ and $EC_{50}$ comparisons for vascular reactivity dose response curves.

$E_{\max}$  is expressed as % initial diameter and  $EC_{50}$  is the [PE] producing half of the maximum effect, expressed in  $\mu\text{mol/L}$ .

|                              | <b>Control</b> | <b>Hb <math>\alpha</math> X</b> | <b>Scr X</b>   | <b>Hb<math>\alpha</math> X + L-NAME</b> |
|------------------------------|----------------|---------------------------------|----------------|-----------------------------------------|
| <b><math>E_{\max}</math></b> | 44.0 $\pm$ 7.6 | 65.5 $\pm$ 5.6                  | 38.3 $\pm$ 2.4 | 43.1 $\pm$ 9.9                          |
| <b><math>EC_{50}</math></b>  | 2.1 $\pm$ 0.8  | 26.7 $\pm$ 12.5                 | 2.0 $\pm$ 1.3  | 1.9 $\pm$ 0.2                           |

## Supplemental Figure Legends:

**Supplemental Figure I | Hb  $\alpha$  X peptide does not change eNOS phosphorylation, NO release in untreated and treated coronary endothelial cells or intact aortas.** a, Western blot analysis of pS1177 eNOS and total eNOS from human coronary endothelial cells incubated with Scr X or Hb  $\alpha$  X (n=3). b and c, Nitrite measurements from unstimulated and stimulated (10 $\mu$ M bradykinin, 5 minutes) human coronary endothelial cells treated with Scr X or Hb  $\alpha$  X. In a and b n=3 and in c n=6. In d, abdominal aorta's had no effect on acetylcholine (Ach) dilation capacity in response to addition of Hb  $\alpha$  X, a process almost completely mediated by endothelial NO production. All error bars represent s.e.m.

**Supplemental Figure II | Basal tone measurements following Scr X or Hb  $\alpha$  X and dose response to phenylephrine presented as a change in microns.** a, shows the resting basal tone generated following 20 min peptide treatment. b, shows a dose response curve to phenylephrine with Scr X and Hb  $\alpha$  X peptides expressed as diameter change in microns. n indicates the number of arteries; value in parenthesis shows number of mice. All error bars represent s.e.m.

**Supplemental Figure III | Effects of Hb  $\alpha$  X peptide on wildtype abdominal aortas.** Cumulative dose response curve to PE from murine C57BL/6 abdominal aortic rings treated with control, Scr X or Hb  $\alpha$  X. All error bars represent s.e.m.

**Supplemental Figure IV | Representative tracing of MAP following Hb  $\alpha$  X injection.** Radiotelemetry recording of MAP following a single bolus injection of 5 mg/kg of Scr X or Hb  $\alpha$  X.

**Supplemental Figure V | Hb  $\alpha$  X does not alter NO<sub>x</sub> levels in RBCs.** Isolated RBCs were treated with 5  $\mu$ mol/L Scr X and Hb  $\alpha$  X for 30 minutes. All error bars represent s.e.m.

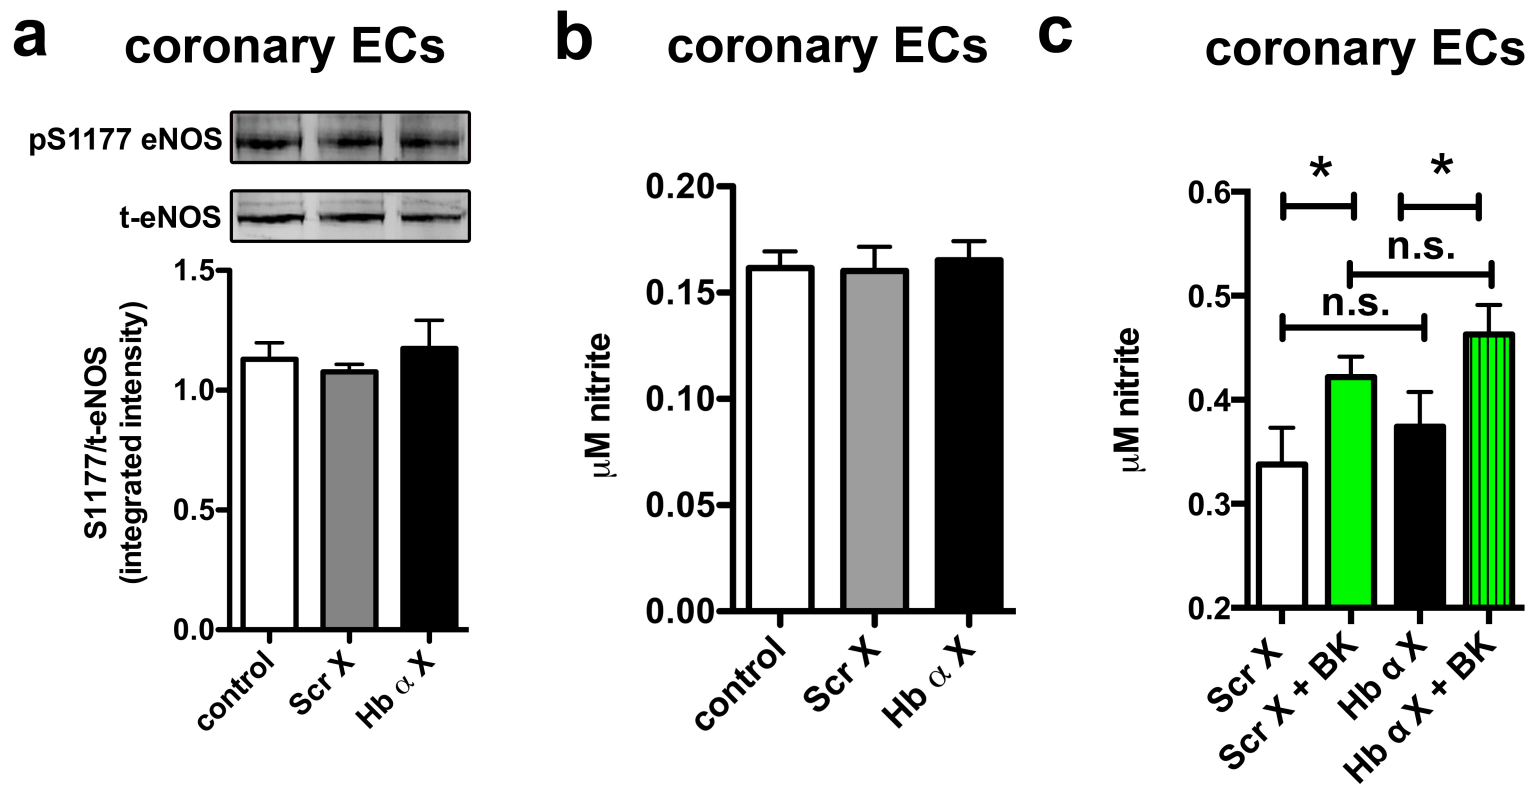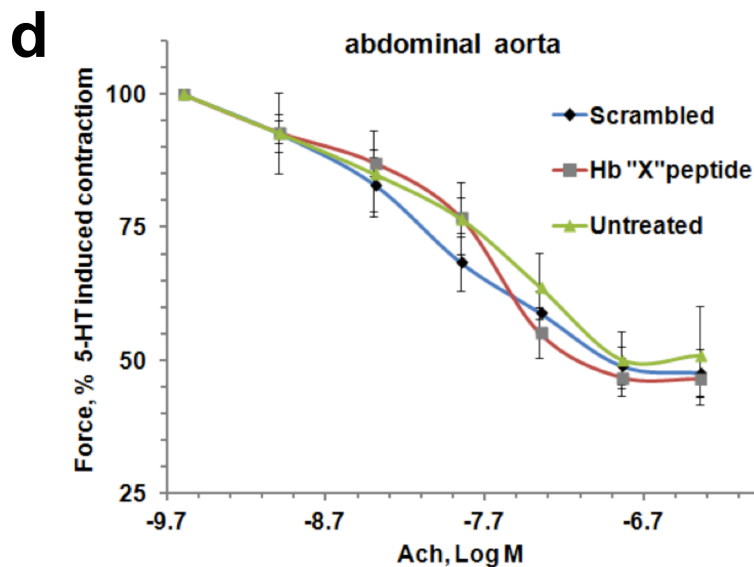

Supplemental Figure I

# a

## Supplemental Figure II

basal tone

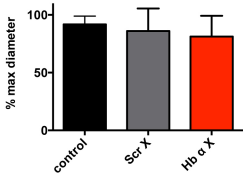

# b

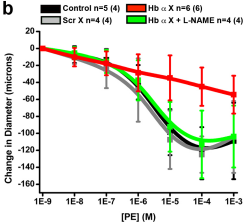

# C57BL/6 abdominal aorta

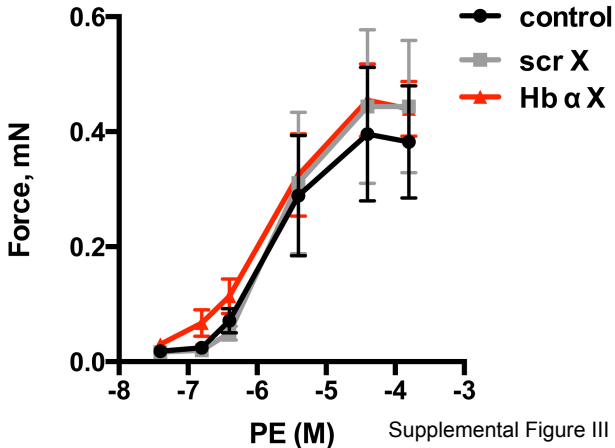

### Representative Trace 1

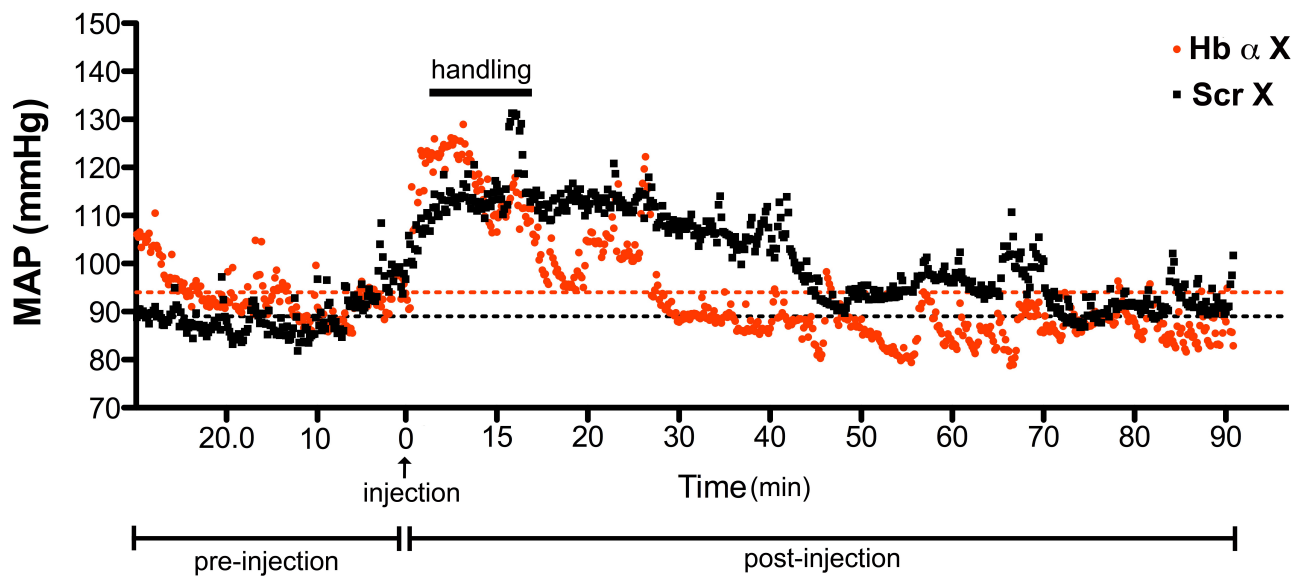

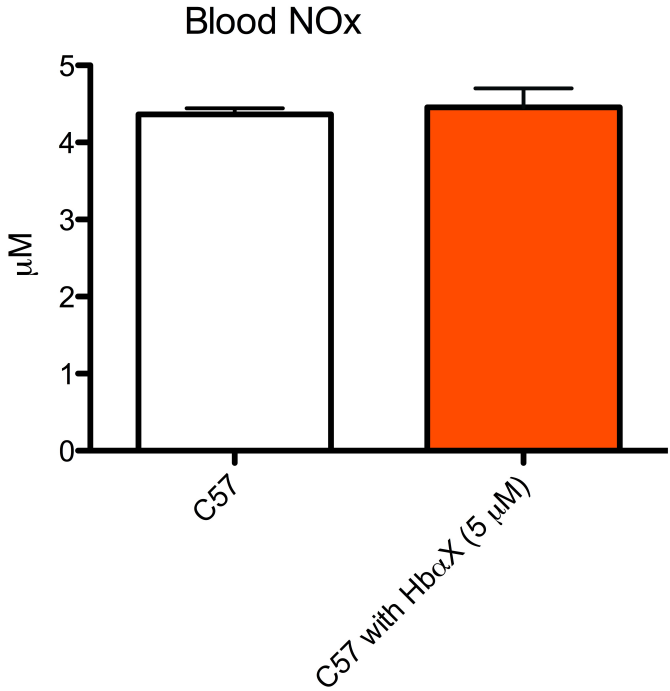

Supplement: NIHMS630200-supplement-Supplemental.pdf [file NIHMS630200-supplement-Supplemental.pdf]
